1 **Rational engineering of an erythropoietin fusion protein to treat hypoxia**

2

3 Jungmin Lee<sup>1,2,5</sup>, Andyna Vernet<sup>2</sup>, Nathalie G. Gruber<sup>1,2,4</sup>, Kasia M. Kready<sup>1</sup>, Devin R. Burrill<sup>1,2</sup>, Jeffrey C.  
4 Way<sup>1,2,3,5,\*</sup> and Pamela A. Silver<sup>1,2</sup>

5

6 <sup>1</sup>Department of Systems Biology, Harvard Medical School, Boston, MA 02115, USA.

7 <sup>2</sup>Wyss Institute for Biologically Inspired Engineering, Harvard University, Boston, MA 02115, USA.

8 <sup>3</sup>Laboratory of Systems Pharmacology, Harvard Medical School, Boston, MA 02115, USA.

9 <sup>4</sup>Current address: Institute of Science and Technology Austria, 3400 Klosterneuburg, Austria.

10 <sup>5</sup>These authors contributed equally to this work.

11

12 \*To whom correspondence should be addressed.

13 Email: Jeffrey\_Way@hms.harvard.edu

14 **Abstract**

15 Erythropoietin enhances oxygen delivery and reduces hypoxia-induced cell death, but its pro-thrombotic  
16 activity is problematic for use of erythropoietin in treating hypoxia. We constructed a fusion protein that  
17 stimulates red blood cell production and neuroprotection without triggering platelet production, a marker  
18 for thrombosis. The protein consists of an anti-glycophorin A nanobody and an erythropoietin mutant  
19 (L108A). The mutation reduces activation of erythropoietin receptor homodimers that induce  
20 erythropoiesis and thrombosis, but maintains the tissue-protective signaling. The binding of the nanobody  
21 element to glycophorin A rescues homodimeric erythropoietin receptor activation on red blood cell  
22 precursors. In a cell proliferation assay, the fusion protein is active at  $10^{-14}$  M, allowing an estimate of the  
23 number of receptor–ligand complexes needed for signaling. This fusion protein stimulates erythroid cell  
24 proliferation *in vitro* and in mice, and shows neuroprotective activity *in vitro*. Our erythropoietin fusion  
25 protein presents a novel molecule for treating hypoxia.

26

27 Key words: CD131, erythropoietin, glycophorin A, hypoxia, tissue protection

## 28 Introduction

29 Erythropoietin (EPO) stimulates red blood cell (RBC) production in response to hypoxia. It inhibits  
30 apoptosis of late-stage erythroid precursors (e.g. CFU-E, BFU-E) and promotes their proliferation and  
31 maturation into the fully committed erythroid lineage. Healthy human adult kidneys constitutively produce  
32 EPO at low levels, maintaining ~1–5 pM of circulating EPO under normoxic conditions to sustain constant  
33 hemoglobin levels (Elliott *et al.*, 2014). In response to hypoxic stress or massive blood loss, EPO  
34 production is stimulated and the number of circulating erythrocytes increases, allowing for more efficient  
35 tissue oxygenation (Ghezzi and Brines, 2004).

36 EPO, like other cytokines and hormones, is pleiotropic and performs several other biological  
37 functions in addition to hematopoiesis. Functional EPO receptors (EPORs) are expressed in many tissues  
38 other than erythroid precursors, such as endothelial cells, cardiomyocytes, and cells of the central  
39 nervous system (Masuda *et al.*, 1994; Ogunshola and Bogdanova, 2013; Hernandez *et al.*, 2017).  
40 Deletion of EPORs in mouse embryos results not only in impaired erythropoiesis, but also in  
41 developmental defects in the heart, the vasculature, and the brain (Ogunshola and Bogdanova, 2013).  
42 Existence of functional EPORs in non-hematopoietic tissues suggests that EPO activates EPORs in  
43 different contexts to induce biological activities that are independent of erythropoiesis.

44 Non-hematopoietic functions of EPO include enhancement of blood clotting and tissue protection  
45 in response to hypoxia. These functions suggest that EPO mediates the body's response to hemorrhage,  
46 rather than simply being an RBC-producing hormone. When an animal is wounded, the immediate  
47 response by the body should be to stop bleeding, increase RBC production, promote tissue oxygenation  
48 and ensure tissue survival until oxygen levels return to baseline. Pro-thrombotic effects have been  
49 observed as adverse side effects of EPO in the treatment of anemia. Chronic kidney failure patients  
50 receiving EPO exhibit higher incidences of strokes, hypertension and death (Drueke *et al.*, 2006; Singh *et al.*,  
51 2006; Pfeiffer *et al.*, 2009). Cancer patients treated with EPO had accelerated tumor growth and lower  
52 survival rate, possibly due to EPORs on cancer cells themselves, increased tumor angiogenesis, and  
53 deep vein thrombosis (Henke *et al.*, 2003; Okazaki *et al.*, 2008; Yasuda *et al.*, 2003). EPO's tissue-  
54 protective effects in response to hypoxia have also been shown in animal models and are suggested in  
55 several clinical studies (Ehrenreich *et al.*, 2002; Ehrenreich *et al.*, 2007; Aloizos *et al.*, 2015). Intravenous  
56 injections of high doses of EPO significantly reduced infarct size and serum markers of brain damage in  
57 acute ischemic stroke patients (Ehrenreich *et al.*, 2002), and improved motor and cognitive function in  
58 multiple sclerosis patients (Ehrenreich *et al.*, 2007). EPO treatment also resulted in a lower mortality rate  
59 and improved neurological recovery amongst traumatic brain injury (TBI) patients (Aloizos *et al.*, 2015).  
60 The protective activity of EPO is general to all cellular insults tested so far, including hypoxia, TBI and  
61 neuronal excitotoxicity (Fantacci *et al.*, 2006; Robinson *et al.*, 2018; Park *et al.*, 2011).

62 Due to its erythropoietic and tissue-protective functions, EPO holds great promise as a  
63 therapeutic for various conditions that cause hypoxia, such as chronic obstructive pulmonary disease  
64 (COPD), right-side heart failure and viral infection that requires use of a ventilator. However, two major

65 challenges have limited the clinical use of EPO for tissue protection resulting from hypoxia. First, EPO  
66 has a pro-thrombotic effect that is observed at low doses, while the tissue-protective effect requires much  
67 higher doses. Thus, doses at which EPO might be effective for tissue protection are considered unsafe.  
68 Second, EPO (30.4 kDa) has a short plasma half-life of ~8 hours after a single intravenous injection in  
69 humans (Bunn, 2013). Its poor pharmacokinetic profile necessitates frequent dosing to maintain the high  
70 levels of EPO required for efficacy.

71 EPO acts through two distinct receptor complexes (Fig. 1A and B). RBC production and clotting is  
72 mediated via EPOR homodimers, whereas the angiogenic and tissue-protective activities of EPO are  
73 thought to be regulated by heterodimers of EPOR and the co-receptor CD131 (also known as the  
74 receptor common beta subunit) (Hanazono *et al.*, 1995; Brines *et al.*, 2004; Leist *et al.*, 2004; Bennis *et al.*,  
75 2012). EPO monomers bind to EPOR homodimers through a strong interaction ( $K_D = 1$  nM) on one  
76 face involving residues such as N147 and R150 (the 'strong face') (Fig. 1A, C and D), and through a  
77 weak interaction ( $K_D = 1$   $\mu$ M) on another face involving residues such as S100, R103, S104 and L108 (the  
78 'weak face') (Fig. 1A, C and E) (Elliott *et al.*, 1997; Syed *et al.*, 1998). Tissue-protective signaling through  
79 putative EPOR–CD131 heterodimers is thought to involve EPO binding to EPOR through its strong face  
80 and an interaction through CD131 that is not well understood (Fig. 1B). This configuration is inferred by  
81 the fact that while weak-face mutations (e.g. S100E and R103E) disrupt EPOR homodimer signaling  
82 (Leist *et al.*, 2004; Elliott *et al.*, 1997) and RBC production, there is essentially no effect on  
83 neuroprotective signaling (Gan *et al.*, 2012). Specifically, Gan *et al.* (2012) introduced nine mutations on  
84 the weak face of EPO, and found that all such mutant proteins mediated neuroprotection – i.e. none of  
85 the mutations disrupted a possible interaction with CD131. Thus, it appears that the weak face of EPO  
86 can be arbitrarily manipulated for protein engineering purposes and still maintain its tissue-protective  
87 function.

88 We previously constructed 'chimeric activator' proteins in which a mutated EPO with lower  
89 receptor affinity is fused to an antibody element that binds to glycoprotein A (GPA) (Taylor *et al.*, 2010;  
90 Burrill *et al.*, 2016; Lee *et al.*, 2020). Burrill *et al.* (2016) demonstrated that a weakened form of EPO with  
91 a mutation in the strong face (R150A) that is also fused to an anti-GPA antibody element can specifically  
92 activate production of RBCs and not platelets. Lee *et al.* (2020) demonstrated that such an anti-  
93 GPA/EPO(mutant) fusion protein can specifically activate RBC formation without stimulation of blood  
94 clotting, provided that the fusion protein cannot mediate adhesion of cells bearing GPA (e.g. RBCs) and  
95 other cells bearing EPORs. The results of Lee *et al.* (2020) also showed a correlation between stimulation  
96 of platelet production and stimulation of thrombosis, indicating that enhancement of platelet formation  
97 could be used as a surrogate marker for EPO-induced thrombosis in these studies. The mutations used in  
98 those studies affected the strong face of EPO and those fusion proteins are therefore expected to affect  
99 formation of EPOR homodimers and EPOR–CD131 heterodimers. These engineered molecules stimulate  
100 RBC formation without activating thrombosis or tissue-protective activity. The present work describes the

101 design of a new molecule that is able to stimulate both RBC production and tissue protection without  
 102 stimulating platelet formation, a surrogate marker of the pro-thrombotic side effect of EPO.  
 103

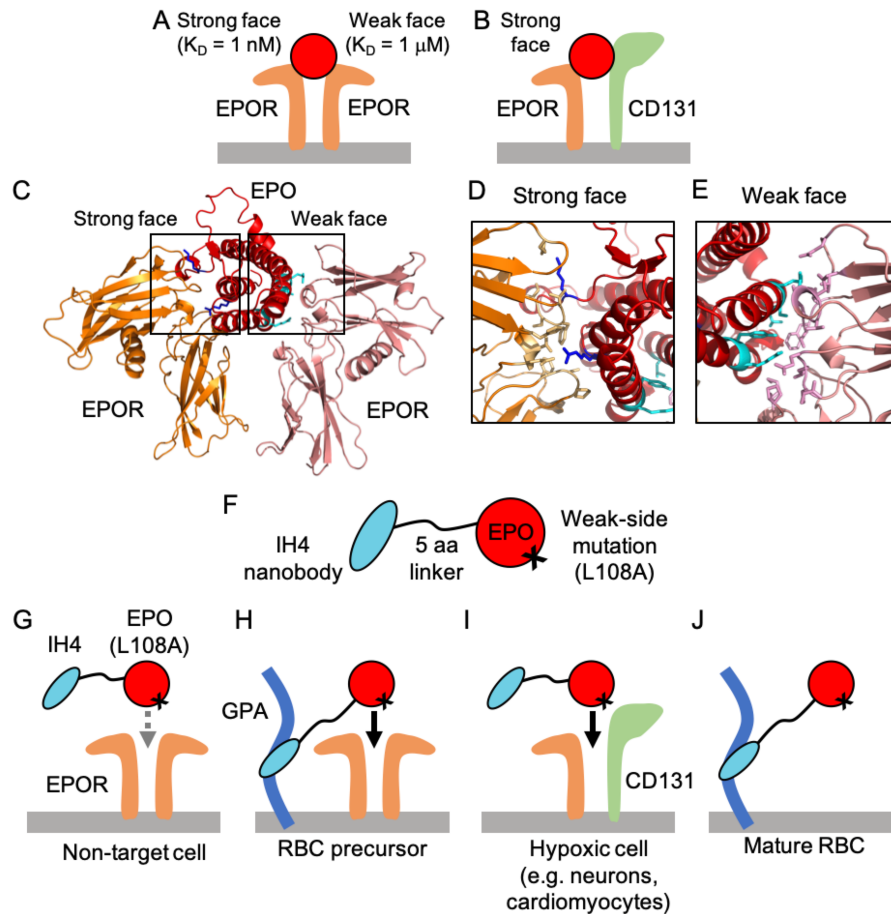

**Fig. 1.** Design rationale for EPO-H fusion protein. **(A–E)** Protein interactions of natural EPO with homodimeric EPOR and heterodimeric EPOR–CD131. **(A)** EPO binds asymmetrically to homodimeric EPOR via two distinct binding interfaces: the strong face ( $K_D = 1$  nM) and the weak face ( $K_D = 1$   $\mu$ M). **(B)** EPO can also bind to EPOR–CD131 receptors via its strong face. **(C)** Protein structure of EPO interacting with homodimeric EPOR (PDB ID: 1EER). Zoom-in of the **(D)** strong and **(E)** weak binding interfaces. For receptor binding and activity, critical EPO residues are shown in **(D)** blue sticks (top: K45, bottom: R150) and **(E)** cyan sticks (top to bottom: R103, S104, L108, Y15, R14). EPOR residues that are within 4 Å of these residues are shown in light yellow and pink sticks in **(D)** and **(E)**, respectively. **(F)** The EPO-H fusion protein consists of the IH4 nanobody, which targets GPA-expressing cells, attached to a mutant EPO by a five-amino acid linker. **(G)** Mutant EPO(L108A) has weakened affinity for homodimeric EPOR, and thus, has little effect on non-target cells that lack GPA. **(H)** On erythropoietic target cells that express both GPA and EPOR, the binding of IH4 to GPA localizes the fusion protein to the target cell surface and allows activation of homodimeric EPOR. **(I)** The L108A mutation in the EPO element does not disrupt EPO interaction with CD131. As a result, IH4-EPO(L108A) can induce tissue-protective activity via a heterodimeric EPOR–CD131 receptor complex. **(J)** IH4-EPO(L108A) also binds to mature RBCs via GPA, thereby extending its plasma half-life.

104  
 105

106 **Results**

107 **Rational design of EPO fusion proteins to address hypoxia**

108 Our work aims to improve the pharmacokinetics and therapeutic window of EPO, so to harness  
 109 both its erythropoietic and tissue-protective effects while avoiding thrombosis. To achieve this goal, we  
 110 designed EPO fusion proteins (EPO-H; H for hypoxia) based on the concept of a ‘chimeric activator’  
 111 previously developed (Taylor *et al.*, 2010; Burrill *et al.*, 2016; Lee *et al.*, 2020).

112 EPO-H consists of the nanobody element IH4, which binds to the target antigen GPA, and a  
 113 mutated version of EPO, fused via a flexible five-amino acid linker (Fig. 1F). We hypothesized that a  
 114 mutation in the EPO element could weaken its affinity to homodimeric EPOR, thereby avoiding undesired  
 115 pro-thrombotic effects triggered by homodimeric EPOR signaling on non-target cells (Fig. 1G). The  
 116 desired erythropoietic activity is rescued by targeted EPO activity on RBC precursor cells directed by the  
 117 binding of the antibody element, IH4, to the target antigen, GPA (Fig. 1H). This way, EPO activates  
 118 homodimeric EPORs only on RBC precursors, mitigating the unwanted thrombotic side effects via non-  
 119 target cells.

120

121 **Table I.** Table depicting predicted properties of wildtype EPO and engineered EPO-H variants. Predicted  
 122 properties: RBC production, thrombosis, tissue protection, and expected half-life. “+” = increase, “-” =  
 123 decrease or no effect.

|                      | Mutation      | Protein        | RBC production | Thrombosis | Tissue protection | Expected Half-life |
|----------------------|---------------|----------------|----------------|------------|-------------------|--------------------|
|                      | Wildtype      | EPO            | +              | +          | +                 | Short              |
| Strong-face mutation | R150A (Leaky) | EPO(R150A)     | -              | -          | -                 | Short              |
|                      |               | IH4-EPO(R150A) | +              | -          | -                 | Extended           |
|                      | K45D (Tight)  | EPO(K45D)      | -              | -          | -                 | Short              |
|                      |               | IH4-EPO(K45D)  | -              | -          | -                 | Extended           |
| Weak-face mutation   | L108A (Leaky) | EPO(L108A)     | -              | -          | +                 | Short              |
|                      |               | IH4-EPO(L108A) | +              | -          | +                 | Extended           |
|                      | S104I (Tight) | EPO(S104I)     | -              | -          | +                 | Short              |
|                      |               | IH4-EPO(S104I) | -              | -          | +                 | Extended           |

124

125 At the same time, it is important to ensure that the same mutation in the EPO element does not  
 126 disrupt EPO binding to heterodimers of EPOR and the co-receptor CD131 when the tissue-protective  
 127 activity is desired (Fig. 1I). Several EPO mutants were designed based on previous mutagenesis studies  
 128 (Elliott *et al.*, 1997; Gan *et al.*, 2012). The predicted behaviors of these EPO mutants, either alone or  
 129 when fused to an anti-GPA antibody element, are outlined in Table I. As part of the design strategy, we  
 130 use “leaky mutations” that reduce but do not abolish binding; in practice these are mutations in which an

131 amino acid with a long side chain is replaced by one with a shorter side chain, so that no steric hindrance  
 132 results and binding is possible. As controls, we also use “tight mutations” in which a side chain is  
 133 lengthened or the charge of a side chain is reversed, so that a binding activity would be completely lost  
 134 due to the specific mutation. Because the binding mode of EPO to EPOR–CD131 is not elucidated, unlike  
 135 that of EPO to homodimeric EPOR, several single point mutations were made in both of the known EPOR  
 136 contact regions (strong and weak faces, each with  $K_D$  of 1 nM and 1  $\mu$ M, respectively). Two residues on  
 137 the strong face, K45 and R150, and five residues on the weak face, R14, Y15, R103, S104 and L108,  
 138 were mutated and tested for targeted erythropoietic and tissue-protective activities (Table II and Fig. S1).

139 EPO-H is also expected to have enhanced pharmacokinetics. Fusing mutated EPO to the IH4  
 140 nanobody not only increases the size of the molecule to avoid renal clearance, but it also directs the  
 141 fusion protein to mature RBCs in circulation, further extending serum half-life (Fig. 1J) (Kontos and  
 142 Hubbell, 2010; Kontos *et al.*, 2013; Burrill *et al.*, 2016). Through these strategies, we constructed EPO-H  
 143 fusion proteins that would allow administration of high doses required for tissue protection but avoid  
 144 thrombosis, thereby achieving prolonged activity in the body and reduced dosing frequency.

145

146 **Table II.** *In vitro* stimulation of TF-1 cell proliferation by EPO mutants and their fusion to IH4. *N* indicates  
 147 the number of repeat experiments, each containing three replicates. N.D. = Not determined. N.A. = Not  
 148 active.

|                | Protein                                 | EPO      |                                |                                       | IH4-EPO       |                                |                                       |
|----------------|-----------------------------------------|----------|--------------------------------|---------------------------------------|---------------|--------------------------------|---------------------------------------|
|                |                                         | <i>N</i> | Log( $EC_{50}$ ) (M)<br>± S.D. | $EC_{50}$ relative<br>to epoetin alfa | <i>N</i>      | Log( $EC_{50}$ ) (M)<br>± S.D. | $EC_{50}$ relative<br>to epoetin alfa |
| Control        | Epoetin alfa<br>(Epoegen <sup>®</sup> ) | 21       | -10.22 ± 0.32                  | 1                                     | 0             | N.D.                           | N.D.                                  |
|                | Darbepoetin<br>(Aranesp <sup>®</sup> )  | 10       | -9.06 ± 0.27                   | 14.20                                 | 0             | N.D.                           | N.D.                                  |
| Strong<br>Face | K45D                                    | 4        | -6.68 ± 0.65                   | 3425.96                               | 2             | -9.21 ± 0.49                   | 10.04                                 |
|                | R150A                                   | 8        | -8.14 ± 0.06                   | 119.32                                | 9             | -10.41 ± 0.29                  | 0.64                                  |
| Weak<br>Face   | S104I                                   | 2        | N.A.                           | N.A.                                  | 2             | N.D.                           | N.D.                                  |
|                | R14E                                    | 1        | N.A.                           | N.A.                                  | 3             | N.A.                           | N.A.                                  |
|                | R14Q                                    | 1        | N.A.                           | N.A.                                  | 2             | N.A.                           | N.A.                                  |
|                | R14N                                    | 1        | N.A.                           | N.A.                                  | 2             | N.A.                           | N.A.                                  |
|                | Y15I                                    | 2        | N.A.                           | N.A.                                  | 2             | N.A.                           | N.A.                                  |
|                | R103I                                   | 1        | N.A.                           | N.A.                                  | 3             | N.A.                           | N.A.                                  |
|                | R103Q                                   | 2        | N.A.                           | N.A.                                  | 3             | N.A.                           | N.A.                                  |
|                | R103K                                   | 6        | -9.93 ± 0.40                   | 1.94                                  | 8             | -13.16 ± 1.74                  | 1.14x10 <sup>-3</sup>                 |
| L108A          | 5                                       | N.A.     | N.A.                           | 5                                     | -13.74 ± 1.54 | 2.99x10 <sup>-4</sup>          |                                       |

149

### 150 Erythropoietic activity of EPO variants *in vitro*

151 The ability of different EPO mutants to promote RBC production was tested *in vitro* via TF-1 cell  
 152 proliferation assays. TF-1 is an immature erythroid cell line that expresses both EPOR and GPA (1620 ±  
 153 140 and 3860 ± 780 molecules per cell, respectively) (Taylor *et al.*, 2010), and requires EPO, GM-CSF, or  
 154 IL-3 for growth (Kitamura *et al.*, 1989). TF-1 cells were starved of cytokines overnight and then exposed  
 155 to EPO variants for 72 hr. Their proliferation was measured by a standard tetrazolium-based assay. Wild-

156 type EPO (epoetin alfa) and hyperglycosylated EPO (darbopoetin) exhibited  $EC_{50}$  values of  $\sim 0.1$  nM and  
 157  $\sim 1$  nM, respectively. EPO mutations on the strong binding face reduced activity of unfused EPO by  $\sim 120$ -  
 158 to 3400-fold relative to epoetin alfa. When these mutants were fused to IH4, their activities were rescued  
 159 by  $\sim 180$ - to 340-fold relative to unfused mutants, showing comparable activity to epoetin alfa and  
 160 darbopoetin (Table II and Fig. S1). The unfused EPOs with mutations on the weak face showed no  
 161 activity at concentrations ranging from  $10^{-14}$  to  $10^{-7}$  M, except for EPO(R103K), which had a slightly lower  
 162  $EC_{50}$  value compared to epoetin alfa and approximately two-fold lower efficacy ( $E_{max}$ ) (Table II and Fig.  
 163 S1). When EPO(R103K) was fused to IH4, the fusion protein exhibited significantly enhanced activity,  
 164 with its  $EC_{50}$  value in a low femtomolar range. Among the weak-face mutants that completely lacked  
 165 erythropoietic activity, only IH4-EPO(L108A) exhibited targeted erythropoietic activity, while the others  
 166 remained inactive even after fusion. Similar to IH4-EPO(R103K), IH4-EPO(L108A) also had an  $EC_{50}$  of  
 167  $\sim 1$ – $10$  fM (Table II and Fig. 2A).

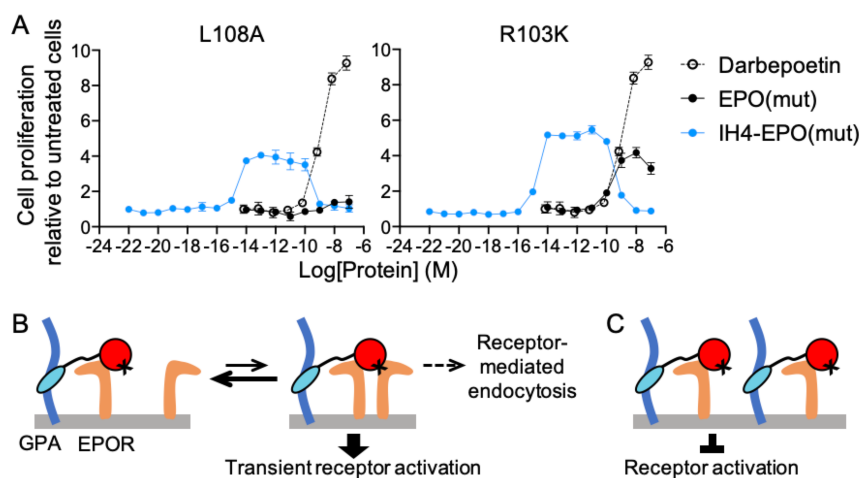

**Fig. 2.** Receptor activation by IH4-EPO(L108A or R103K) in TF-1 cells follows a bell-shaped dose response curve. **(A)** IH4-EPO(L108A or R103K) was tested for stimulation of proliferation of TF-1 cells, which express both EPOR and GPA (Taylor *et al.*, 2010). The fusion proteins show extremely high potency, with  $EC_{50}$  values at a low femtomolar range, and a drop in bioactivity at high concentrations. Data represent mean  $\pm$  S.E.M. of three replicates. **(B,C)** Schematic of proposed mechanisms for the bell-shaped dose response curve. The fusion protein binds to GPA (dark blue) and one copy of EPOR (orange) via IH4 (light blue) and the strong face of EPO (red), respectively. **(B)** At low fusion protein concentrations, EPO has a brief interaction with the second copy of EPOR via the EPO weak face. This transient interaction activates EPOR signaling for cell proliferation, but does not last long enough to trigger receptor-mediated endocytosis. Thus, signaling does not terminate and a few signaling complexes per cell are sufficient to stimulate proliferation. **(C)** At high concentrations, fusion proteins saturate EPORs with a 1:1 stoichiometry via the strong-face interaction, resulting in a low number of complete signaling complexes composed of one ligand and two receptors.

168 The dose-response curve of weak-face mutants fused to IH4 showed two unusual features. First,  
 169 when EPO(L108A or R103K) is fused to IH4, the potency of the fusion protein is enhanced by four to five  
 170 orders of magnitude relative to wild-type EPO and other EPO fusion proteins. The  $EC_{50}$  is  $\sim 1$ – $10$  fM (Fig.  
 171 2A). Secondly, the dose-response curve of IH4-EPO(L108A or R103K) is bell-shaped, with stimulation  
 172 falling off at  $\sim 1$  nM, whereas fusion proteins containing strong-face mutants (K45D and R150A) show



173 standard sigmoidal dose-response curves (Fig. 2A and Fig. S1). We speculate that these features result  
174 from distinct receptor binding properties of weak-face mutants. These mutations further reduce EPO–  
175 EPOR interaction at the weak face, resulting in an extremely rapid off-rate. At low concentrations of the  
176 fusion protein, the binding of EPOR to EPO's weak face, needed for the formation of a complete signaling  
177 complex, may be so transient that the fusion protein activates EPORs for cell proliferation but cannot stay  
178 long enough to be endocytosed. This has the net effect of increasing the frequency of EPOR activation  
179 with a limited amount of the fusion protein (Fig. 2B). At high concentrations, the fusion protein saturates  
180 EPORs in a non-signaling, monomeric form via the strong side, and blocks receptor activation (Fig. 2C).  
181

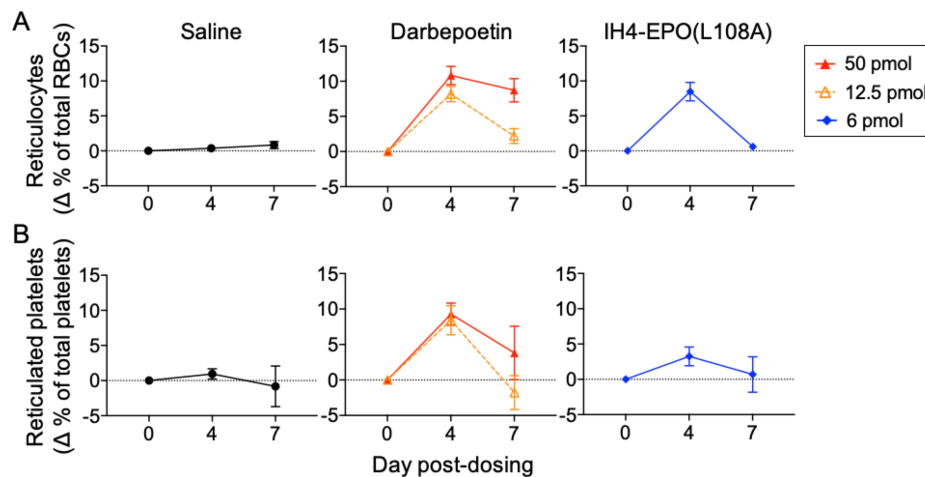

**Fig. 3.** Erythropoietic activity of IH4-EPO(L108A) *in vivo*. Transgenic mice that express human GPA on their RBCs received a single i.p. injection of saline, darbepoetin or IH4-EPO(L108A). Their reticulocyte and reticulated platelet levels were measured by flow cytometry on Days 0, 4 and 7 post-injection. **(A,B)** While untargeted form, darbepoetin, stimulates the production of both reticulocytes and reticulated platelets, IH4-EPO(L108A) specifically stimulates RBC production and not platelet production in these mice. Data represent mean  $\pm$  S.E.M of five mice per dose group.

182

### 183 Targeted erythropoietic activity of EPO-H in mice

184 One of the fusion proteins, IH4-EPO(L108A), was tested for targeted erythropoietic activity in  
185 transgenic mice expressing human GPA. IH4-EPO(L108A) was chosen because EPO(L108A) by itself  
186 showed essentially no homodimeric EPOR activation in TF-1 cell proliferation assay, suggesting that  
187 potential pro-thrombotic side effects would be greatly reduced. Mice received a single intraperitoneal (i.p.)  
188 injection of saline, darbepoetin (50 pmol = 2  $\mu$ g; 12.5 pmol = 0.5  $\mu$ g) or IH4-EPO(L108A) (6 pmol = 0.3  
189  $\mu$ g). Target cell specificity and drug efficacy were measured by staining for reticulocytes and reticulated  
190 platelets in blood samples on Days 0, 4 and 7 post-injection. Reticulocyte and reticulated platelet levels  
191 remained at baseline (Day 0) throughout the experiment in the saline-treated mice, but increased  
192 significantly in mice treated with darbepoetin, a control for the untargeted form of EPO. Mice treated with  
193 IH4-EPO(L108A) had elevated reticulocyte counts (8.47%) that were comparable to those in mice treated

194 with 12.5 pmol of darbepoetin (8.17%) on Day 4 (Fig. 3A), but did not have significantly increased  
195 reticulated platelet counts (Fig. 3B). When various doses were tested (40 pmol = 2  $\mu$ g; 6 pmol = 0.3  $\mu$ g;  
196 1.2 pmol = 0.06  $\mu$ g; 0.2 pmol = 0.01  $\mu$ g), IH4-EPO(L108A) induced reticulocyte responses in a dose-  
197 dependent manner: 40 pmol and 6 pmol resulted in 8.13% and 3.16% increases in reticulocyte counts on  
198 Day 4 relative to Day 0, respectively, while lower doses (1.2 pmol and 0.2 pmol) did not have significant  
199 effects (Fig. S2).

200

### 201 **Tissue-protective activity of EPO variants *in vitro***

202 EPO mutants that displayed targeted erythropoietic activity were further evaluated to confirm their  
203 expected tissue-protective effects in cell-based assays. The ability of a fusion protein to protect cells was  
204 measured *in vitro* by estimating the number of surviving cells after treatment with EPO and a cobalt  
205 chloride (CoCl<sub>2</sub>), which induces a hypoxia response via hypoxia-inducible factor-alpha (HIF-1 $\alpha$ ) due to its  
206 inhibition of prolyl hydroxylase (Epstein *et al.*, 2001; Vengellur and LaPres, 2004; Yuan *et al.*, 2003). SH-  
207 SY5Y, a neuroblastoma cell line that expresses both EPOR and CD131 (Chamorro *et al.*, 2013), was co-  
208 treated with engineered EPO variants and 100  $\mu$ M of CoCl<sub>2</sub>. Viable cells were measured 24 hr later by  
209 standard tetrazolium dye-based assays. The optimal cell density and concentration of CoCl<sub>2</sub> were chosen  
210 to cause ~30–40% cell viability in the absence of EPO.

211 The control proteins, wild-type EPO (EPO(WT)) and EPO(S104I), protect neuroblastoma cells  
212 from CoCl<sub>2</sub> insult, although EPO(S104I) had a much weaker effect than the wild-type (Fig. 4A, B and Fig.  
213 S3). This is consistent with the previous results that EPO(WT) and EPO(S104I) protected primary  
214 neurons from N-methyl-D-aspartic acid (NMDA)-induced excitotoxicity (Gan *et al.*, 2012). While a fusion  
215 protein containing a strong-face mutant, IH4-EPO(K45D), did not protect cells from CoCl<sub>2</sub>-induced cell  
216 death (Fig. 4C and Fig. S3), fusion proteins containing a weak-face mutant, IH4-EPO(R103K) and IH4-  
217 EPO(L108A), exhibited neuroprotective effects (Fig. 4D, E and Fig. S3). Similarly, a weak-face mutant,  
218 EPO(L108A), also showed neuroprotective effect against CoCl<sub>2</sub>-induced hypoxic damage in the absence  
219 of fusion to the IH4 nanobody (Fig. 4F and Fig. S3). Four-parameter fits of these data did not give  
220 accurate EC<sub>50</sub> values because the readouts did not reach saturation within the measured concentration  
221 range. Despite this caveat, four-parameter fits provided rough estimates for the potency of each variant.  
222 The EC<sub>50</sub> values of EPO(WT) and EPO(S104I) were ~1–5 nM. The EC<sub>50</sub> values of IH4-EPO(R103K), IH4-  
223 EPO(L108A) and EPO(L108A) were estimated to be ~10–20 nM (Fig. 4G).

224 Although the dynamic range and the four-parameter fits varied between independent  
225 experiments, these EPO variants showed reproducible effects when they were repeated several times  
226 and even when they were tested under different experimental conditions (Fig. S3–S5). When SH-SY5Y  
227 cells were pre-exposed to EPO variants 24 hr before receiving 100  $\mu$ M of CoCl<sub>2</sub>, EPO(L108A or R103K)  
228 in both unfused and fused forms protected cells from hypoxia-induced cell death (Fig. S4).

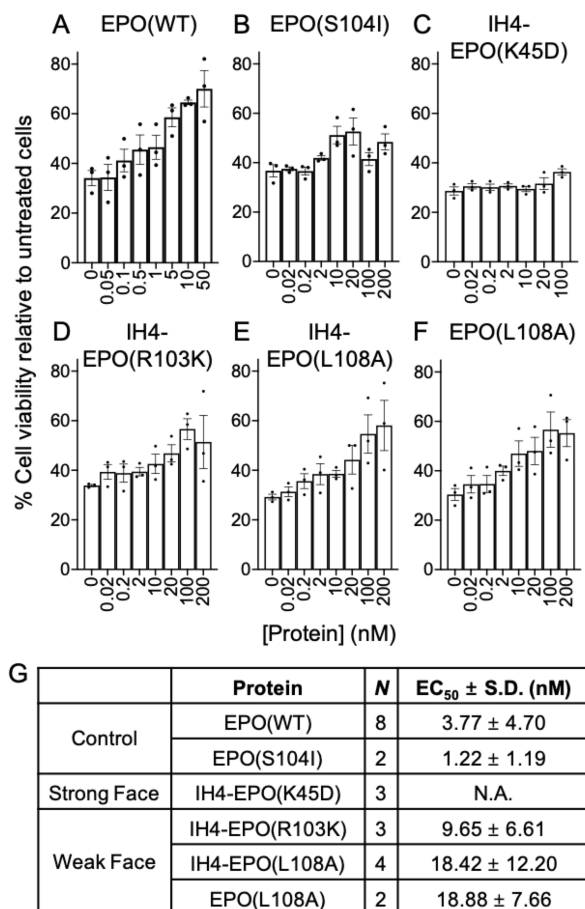

**Fig. 4.** Ability of EPO variants to protect neuronal cells from CoCl<sub>2</sub>-induced hypoxic damage *in vitro*. SH-SY5Y cells were co-treated with EPO and CoCl<sub>2</sub> for 24 hr and cell viability was measured. **(A,B)** Positive controls, EPO(WT) and EPO(S104I), protect neuronal cells from cell death in a dose-dependent manner, but **(C)** fusion protein containing a strong-face mutant, IH4-EPO(K45D), does not promote neuroprotection. **(D–F)** EPO variants containing a weak-face mutation, EPO(L108A) and IH4-EPO(L108A) or R103K, also show neuroprotective effect against CoCl<sub>2</sub>-induced hypoxic damage. Data represent mean ± S.E.M. of three replicates. **(G)** A summary of tissue-protective activity of EPO variants. *N* indicates the number of repeat experiments, each containing two to four replicates. EC<sub>50</sub> values were estimated by the standard four-parameter non-linear fit. See Supplementary Information for more details.

229

## 230 Discussion

231 In this work, we constructed an EPO fusion protein that can provide both erythropoietic and  
 232 tissue-protective effects without causing thrombotic side effects. This novel molecule is designed to  
 233 prevent or treat hypoxia-mediated damage in patients suffering from illnesses, such as COPD and right-  
 234 side heart failure, to prevent altitude sickness in military personnel acclimating to high altitude regions and  
 235 possibly to enhance physical performance. It may also alleviate organ damage caused by hypoxia in  
 236 COVID-19 patients at risk of requiring a ventilator. However, achieving a safe and tissue-protective dose  
 237 of EPO is a challenge: the maximum allowed dose in patients with chronic kidney disease is limited by its  
 238 pro-thrombotic effects (Nichol *et al.*, 2015), and the dose of EPO required for tissue-protective effects is at

239 least as high or higher than for erythropoiesis (Masuda *et al.*, 1994). If doses are limited to non-thrombotic  
240 “safe” levels, then EPO is likely to fail in clinical trials for tissue protection because such doses are below  
241 what is effective for tissue protection and not necessarily because the drug itself is not effective. By using  
242 the chimeric activator design, we addressed two major challenges in using EPO activity for the treatment  
243 of hypoxia – retaining both the erythropoietic activity and tissue-protective functions of EPO while  
244 reducing or eliminating its pro-thrombotic activity.

245 Previously described EPO derivatives lack the desired features for treatment of hypoxia.  
246 Darbeoetin simply extends the plasma half-life but has the same activities as EPO itself (Egrie and  
247 Browne, 2001; Egrie *et al.*, 2003). Carbamylated EPO (Leist *et al.*, 2004) and weak-face EPO mutants  
248 (such as EPO(S104I) (Gan *et al.*, 2012)) retain neuroprotective activity but completely lack erythropoietic  
249 and pro-thrombotic activity. Targeted EPO molecules that we have constructed (Burrill *et al.*, 2016; Lee *et*  
250 *al.*, 2020) retain erythropoietic activity and are not pro-thrombotic, but are predicted to lack tissue-  
251 protective activity because they contain a mutation in the surface of EPO that strongly binds to EPOR;  
252 this surface is predicted to be critical for binding to EPOR–CD131 heterodimers that mediate tissue  
253 protection.

254 We therefore designed new EPO derivatives by combining two features: (1) a mutation on the  
255 surface of EPO that interacts weakly with EPOR, since such mutant EPOs retain tissue-protective activity  
256 and (2) an antibody-based GPA-binding element that should rescue activity on RBC precursors. This  
257 design mimics our previous Targeted EPO, except that the EPO mutation is in the weak face instead of  
258 the strong face with respect to interaction with EPOR. We found that most mutations in the weak face  
259 (specifically R14E, R14Q, R14N, Y15I, R103I and R103Q) abolished erythropoietic activity in cell-based  
260 proliferation assays, and the mutation R103K caused only a slight reduction in this assay. In contrast,  
261 EPO containing the mutation L108A completely lacked *in vitro* erythropoietic activity, but this activity was  
262 rescued when the mutant protein was fused to the GPA-targeting nanobody IH4 (Table II, Fig. 2A and  
263 Fig. S1). In addition, this fusion protein retained erythropoietic activity *in vivo* (Fig. 3 and Fig. S2), with a  
264 potency similar to our Targeted EPO and EPO itself (Burrill *et al.*, 2016; Lee *et al.*, 2020). Finally, the IH4-  
265 EPO(L108A) fusion protein still showed neuroprotective activity *in vitro* in an assay in which  
266 neuroblastoma cells were treated with CoCl<sub>2</sub>, which induces a hypoxia response (Fig. 4, Fig. S3 and Fig.  
267 S4). Thus, the fusion protein IH4-EPO(L108A) is a potential candidate for treatment of hypoxia.

268 In *in vitro* testing for erythropoietic activity, the IH4-EPO(L108A) and IH4-EPO(R103K) fusion  
269 proteins showed two unusual properties: (1) extreme potency, with activity detectable at ~1–10 fM  
270 concentrations, and (2) loss of activity at ~1 nM concentration (Fig. 2A). These observations were made  
271 based on TF-1 erythroleukemia cell proliferation assays, in which cells were stimulated by wild-type EPO  
272 and engineered proteins. These effects are likely not relevant *in vivo*, since IH4-EPO(L108A) stimulates  
273 erythropoiesis at doses similar to EPO itself and does not show signs of extreme potency or auto-  
274 inhibition (Fig. 3 and Fig. S2). Nonetheless, it may be useful to have a working model of these  
275 observations, as such an understanding may inform the engineering of other targeted proteins.

276 We propose two mechanisms that could, in combination, explain the extremely high potency of  
277 IH4-EPO(L108A or R103K). First, the attachment of the fusion protein to GPA could prevent receptor-  
278 mediated endocytosis and degradation of the signaling protein. In differentiating erythroleukemic cells,  
279 GPA is attached to a stable actin cytoskeleton that may preclude internalization. In non-differentiating  
280 erythroleukemic cells, GPA is internalized by a clathrin-mediated pathway but at a much slower rate  
281 compared to other membrane proteins (Marshall *et al.*, 1984; Ktistakis *et al.*, 1990). Therefore, binding to  
282 GPA may interfere with internalization and degradation of the fusion protein. However, simple attachment  
283 of an EPO fusion protein to GPA does not profoundly enhance its potency, since we do not observe  
284 highly potent activity with other anti-GPA/EPO fusion proteins. Second, we propose that the fusion protein  
285 may form a highly stable complex with GPA and one copy of EPOR via the strongly interacting side of  
286 EPO, but interaction with the second EPOR to form a complete signaling complex may be weak and  
287 dissociate rapidly due to a mutation. The interaction may last long enough to phosphorylate a subset of  
288 the tyrosine residues important in signal transduction into the nucleus but may not be long enough to  
289 phosphorylate residues involved in signaling to the clathrin system for receptor-mediated endocytosis  
290 (Fig. 2B). In these assays, stimulation of proliferation is observed with as few as six to sixty molecules of  
291 fusion protein per cell, suggesting that this is the minimum number of molecules needed to promote  
292 erythropoietic signaling (see Supplementary Information for a quantitative explanation).

293 The loss of activity by IH4-EPO(L108A or R103K) at >1 nM concentrations can be explained by  
294 receptor saturation that has been observed in other systems that require more than two receptors for  
295 signaling (Fuh *et al.*, 1992; Atanasova and Whitty, 2012; Kallenberger *et al.*, 2014). Similar to EPO,  
296 human growth hormone (hGH) asymmetrically binds to two hGH receptors to trigger signaling. Fuh *et al.*  
297 (1992) showed that wild-type hGH inhibits signaling at >2  $\mu$ M, and mutation of the weak-binding face of  
298 hGH further reduces the  $IC_{50}$  value to ~100 nM. They also demonstrated that the antagonistic behaviors  
299 resulted from the disruption of receptor dimerization, using divalent monoclonal antibodies for hGH  
300 receptors (Fuh *et al.*, 1992). Similarly, our fusion protein containing a weak-face EPO mutation may  
301 saturate monomeric EPOR in a 1:1 stoichiometry and block the formation of a complete signaling  
302 complex consisting of homodimeric EPOR, resulting in auto-inhibition of EPO signaling (Fig. 2C).

303 It is important to note that while we observe an enhanced potency of IH4-EPO(L108A) in the cell  
304 based assay, in our *in vivo* erythropoiesis experiments the potency of this molecule was similar to that of  
305 darbepoetin and EPO fusion proteins that we constructed previously. In the *in vitro* assay, there may be  
306 essentially no removal of the fusion protein, while *in vivo* the normal clearance mechanisms would likely  
307 still operate, such as pinocytosis and degradation by Kupffer cells and/or binding to EPORs on non-  
308 erythroid cells and removal by non-signaling receptor-mediated endocytosis (Wiley, 2003).

309 Taken together, our results indicate that IH4-EPO(L108A) could be an ideal molecule for  
310 treatment of hypoxia. The fusion protein is expected to enhance oxygen delivery and prevent hypoxia-  
311 induced cell death, without causing thrombosis. This work demonstrates that our engineering strategies  
312 allow for selective utilization of beneficial EPO activities and inhibition of undesired effects. More broadly,

313 it further solidifies the value of the “chimeric activator” approach in designing targeted protein  
314 therapeutics.

315

## 316 **Methods**

### 317 **Cell culture**

318 FreeStyle 293-F and FreeStyle CHO-S cell lines were obtained from Invitrogen (Carlsbad, CA) and  
319 cultured in FreeStyle 293 Expression Medium and complete FreeStyle CHO Expression Medium  
320 (Invitrogen), respectively. Human erythroleukemia TF-1 and human neuroblastoma SH-SY5Y were  
321 obtained by ATCC (Manassas, VA). TF-1 was cultured in RPMI-1640 with 10% FBS, 100 U/mL penicillin,  
322 100 U/mL streptomycin, and 2 ng/mL recombinant human granulocyte macrophage colony-stimulating  
323 factor (GM-CSF; PeproTech) unless specified otherwise. SH-SY5Y was cultured in 1:1 DMEM/F-12 with  
324 10% FBS. 293-F and CHO-S were cultured at 37°C in 8% CO<sub>2</sub> with shaking at 2.35 x g. TF-1 and SH-  
325 SY5Y were cultured at 37°C in 5% CO<sub>2</sub>.

326

### 327 **DNA constructs**

328 The DNA sequence for EPO wild-type was from GenBank (accession no. KX026660). EPO mutant  
329 sequences were constructed by introducing a codon change into the wild-type sequence. The DNA  
330 sequence for the IH4 nanobody was derived by reverse translating and codon optimizing (Integrated DNA  
331 Technologies) the protein sequence adapted from the US patent 9879090 (Bertrand *et al.*, 2018). It was  
332 modified to include a point mutation (Phe80Tyr) in the framework region 3 to reflect the consensus of the  
333 germline sequences, and an additional amino acid (Thr118) in the framework region 4, as the reported  
334 sequence had a typographical error. See Supplementary Information for individual sequences.

335

### 336 **Protein expression and purification**

337 Transient expression was performed in 293-F and CHO-S cells using pSecTag2A or pOptiVEC plasmids  
338 according to the supplier’s protocol. 4–6 days after transfection, protein expression was assayed by  
339 Western blotting cell supernatant using anti-6xHis-HRP antibody (Abcam). Proteins from transient  
340 transfection were purified as follows. Supernatant was concentrated to 5–8 mL using a 10 kDa cut-off  
341 Macrosep Advance centrifugal device (Pall). Concentrated protein was bound to 0.5–1 mL of His60 nickel  
342 or HisTalon cobalt resin (Takara Bio) for 0.5–1 hr at 4°C while rotating in a 10-mL Pierce disposable  
343 column (Thermo Scientific), and was washed and eluted using His60 or HisTalon Buffer Set (Takara Bio)  
344 according to the supplier’s protocol. Cell supernatant and each purification fraction were analyzed by  
345 SDS–PAGE followed by Coomassie Blue staining. Eluted proteins were combined, desalted into  
346 endotoxin-free PBS (Teknova: 137 mM NaCl, 1.4 mM KH<sub>2</sub>PO<sub>4</sub>, 4.3 mM Na<sub>2</sub>HPO<sub>4</sub>, and 2.7 mM KCl, pH  
347 7.4) using Econo-Pac 10DG columns (Bio-Rad), and concentrated to <1 mL using Macrosep Advance  
348 centrifugal device.

349 For *in vivo* experiments, contaminating proteins were further removed by anion-exchange  
350 chromatography (AIEX) on HiPrep DEAE FF 16/10, followed by size exclusion chromatography (SEC) on  
351 Superdex 200 10/300 GL columns (Cytiva), using AKTA FPLC system (Cytiva). For AIEX, 1 M Tris-HCl,  
352 pH 8.0 was used as the starting buffer and a linear gradient up to 1 M NaCl was used for elution. For  
353 SEC, endotoxin-free PBS was used as the running buffer. Desired protein fractions were combined and  
354 concentrated to <1 mL using Macrosep Advance centrifugal device. Proteins were stored at 4°C  
355 throughout the described process, ultimately stored as aliquots at -80°C, and thawed once before use.  
356 Only endotoxin-free reagents were used.

357

### 358 **TF-1 cell proliferation assays**

359 TF-1 cells were seeded in a 96-well plate at  $9.0 \times 10^3$  cells per well in 90  $\mu$ L of RPMI-1640 with serum and  
360 antibiotics (no GM-CSF). The purified proteins were serially diluted by 10-fold ( $10^{-7}$  to  $10^{-14}$  or  $10^{-21}$  M) or  
361 100-fold ( $10^{-7}$  to  $10^{-21}$  M) and added to the cells. Cells were incubated at 37°C in 5% CO<sub>2</sub> for 72 hr. Cell  
362 proliferation was determined by CellTiter 96<sup>®</sup> AQueous One Solution Cell Proliferation Assay (Promega)  
363 or adding 10  $\mu$ L of WST-1 reagent (Roche). 2–4 hr after adding the reagent, absorbance at 490 nm (and  
364 background absorbance at 650 nm when using WST-1) was read on a BioTek Synergy Neo HTS  
365 microplate reader. Reported data represent mean  $\pm$  SEM of three replicates.

366

### 367 **Measuring mouse reticulocytes and reticulated platelets**

368 Human GPA-transgenic FVB mice were generously donated by the Hendrickson Laboratory at Yale  
369 University (Auffray *et al.*, 2001). This strain underwent embryo re-derivation at Charles River  
370 Laboratories. The homozygous human GPA transgene is embryonic-lethal but heterozygotes are  
371 phenotypically normal, so a breeding colony was maintained with screening for human GPA at each  
372 generation. Transgene expression was measured as described before (Burrill *et al.*, 2016).

373 Five mice per dose group received a single intraperitoneal (i.p.) injection with saline, darbepoetin  
374 or EPO fusion protein in a 200  $\mu$ L volume (diluted in saline or PBS) on Day 0. 1–5  $\mu$ L of whole blood was  
375 collected by tail-nick in EDTA-coated tubes on Days 0, 4 and 7 post-injection. Blood was analyzed  
376 immediately after collection by flow cytometry as described before (Burrill *et al.*, 2016). Briefly, thiazole  
377 orange (Sigma-Aldrich) was used to stain residual RNA in reticulocytes and reticulated platelets, and anti-  
378 CD41-PE antibody (BD Pharmingen) was used to stain total platelets. A stock solution (1 mg/mL) of  
379 thiazole orange was prepared in 100% methanol and was diluted 1:5,000 in PBS to make a 2x working  
380 solution. Anti-CD41-PE antibody was diluted 1:500 in either the 2x working solution of thiazole orange for  
381 stained samples or PBS for gating thiazole orange-negative population. Whole blood was diluted 1:1,000  
382 in PBS. Equal volumes (100  $\mu$ L) of 2x working solution of anti-CD41-PE antibody with or without thiazole  
383 orange and diluted whole blood were mixed in a 96-well U-bottom plate and incubated for 30 min in the  
384 dark at 23 °C. The fluorescence was measured on a LSRFortessa SORP flow cytometer equipped with

385 an optional HTS sampler (BD Biosciences) using the following filter configuration: PE excitation, 561/50  
386 mW; emission filter, BP 582/15; YFP excitation, 488/100 mW; emission filter, BP 540/25.

387

### 388 **Tissue protection assay**

389 SH-SY5Y cells were seeded in a 96-well plate at  $4.8 \times 10^4$  cells per well in 80  $\mu\text{L}$  of 1:1 DMEM/F-12 with  
390 10% FBS, and let adhere overnight at 37°C in 5%  $\text{CO}_2$ . In co-treatment experiments, cells received  
391 varying concentrations of purified proteins (0.02 to 200 nM) and 100  $\mu\text{M}$  of cobalt chloride ( $\text{CoCl}_2$ ), a  
392 hypoxia mimicking agent, and were incubated at 37°C in 5%  $\text{CO}_2$  for 24 hr. In pre-treatment experiments  
393 (Fig. S4), cells were treated with purified proteins 24 hr before receiving  $\text{CoCl}_2$  and were incubated at  
394 37°C in 5%  $\text{CO}_2$  for additional 24 hr after adding  $\text{CoCl}_2$ . Cell viability was measured by CellTiter 96@  
395  $\text{AQ}_{\text{ueous}}$  One Solution Cell Proliferation Assay (Promega). 2–4 hr after adding the reagent, absorbance at  
396 490 nm was read on a BioTek Synergy Neo HTS microplate reader. In experiments shown in  
397 Supplementary Figure 5, SH-SY5Y cells were seeded in a 96-well plate at  $1.2 \times 10^4$  cells per well in 80  $\mu\text{L}$ .  
398 On the next day, cells were co-treated with varying concentrations of purified proteins (0.02 to 200 nM)  
399 and 25 or 50  $\mu\text{M}$  of  $\text{CoCl}_2$ , and incubated at 37°C in 5%  $\text{CO}_2$  for 72 hr. Cell viability was measured by  
400 adding 10  $\mu\text{L}$  of WST-1 reagent (Roche). 4 hr after adding the reagent, absorbance at 490 nm and 650  
401 nm (background) was read on a BioTek Synergy Neo HTS microplate reader. Reported data represent  
402 mean  $\pm$  S.E.M of two to four replicates.

403

### 404 **Acknowledgements**

405 This work was supported by funds from the Wyss Institute for Biologically Inspired Engineering and the  
406 Boston Biomedical Innovation Center (Pilot Award 112475; Drive Award U54HL119145). J.L., K.M.K.,  
407 D.R.B., J.C.W. and P.A.S. were supported by the Harvard Medical School Department of Systems  
408 Biology. J.C.W. was further supported by the Harvard Medical School Laboratory of Systems  
409 Pharmacology. A.V., D.R.B. and P.A.S. were further supported by the Wyss Institute for Biologically  
410 Inspired Engineering. N.G.G. was sponsored by the Army Research Office under Grant Number  
411 W911NF-17-2-0092. The views and conclusions contained in this document are those of the authors and  
412 should not be interpreted as representing the official policies, either expressed or implied, of the Army  
413 Research Office or the U.S. Government. The U.S. Government is authorized to reproduce and distribute  
414 reprints for Government purposes notwithstanding any copyright notation herein. We sincerely thank  
415 Amanda Graveline and the Wyss Institute at Harvard for their scientific support.

416

### 417 **Author contributions**

418 J.L., K.M.K. and J.C.W. designed research; J.L., A.V., N.G.G., K.M.K. and J.C.W. performed research;  
419 J.L., K.M.K., D.R.B. and J.C.W. analyzed data; and, J.L., D.R.B., J.C.W. and P.A.S. wrote the paper.

420

421



422 **Conflict of Interest Statement**

423 J.C.W., D.R.B. and P.A.S. are shareholders in a company that has a license to the IH4 antibody element  
424 described in this work.

425

426 **References**

- 427 1. Aloizos, S., Evodia, E., Gourgiotis, S., Isaia, E.C., Seretis, C. and Baltopoulos, G.J. (2015) *Turk*  
428 *Neurosurg*, **25**, 552–558.
- 429 2. Atanasova, M. and Whitty, A. (2012) *Crit Rev Biochem Mol Biol*, **47**, 502–530.
- 430 3. Auffray, I., Marfatia, S., de Jong, K., Lee, G., Huang, C.H., Paszty, C., Tanner, M.J., Mohandas,  
431 N. and Chasis, J.A. (2001) *Blood*, **97**, 2872–2878.
- 432 4. Bennis, Y., Sarlon-Bartoli, G., Guillet, B., Lucas, L., Pellegrini, L., Velly, L., Blot-Chabaud, M.,  
433 Dignat-Georges, F., Sabatier, F. and Pisano P. (2012) *J Thromb Haemost*, **10**, 1914–1928.
- 434 5. Bertrand, O., Habib, I. and Smolarek, D. (2018) US Patent Application No. 9,879,090.
- 435 6. Brines, M., Grasso, G., Fiordaliso, F., Sfacteria, A., Ghezzi, P., Fratelli, M., Latini, R., Xie, Q.W.,  
436 Smart, J., Su-Rick, C.J., Pobre, E., Diaz, D., Gomez, D., Hand, C., Coleman, T. and Cerami, A.  
437 (2004) *Proc Natl Acad Sci U S A*, **101**, 14907–14912.
- 438 7. Bunn, H.F. (2013) *Cold Spring Harb Perspect Med*, **3**, a011619.
- 439 8. Burrill, D.R., Vernet, A., Collins, J.J., Silver, P.A. and Way J.C. (2016) *Proc Natl Acad Sci U S A*,  
440 **113**, 5245–5250.
- 441 9. Chamorro, M.E., Wenker, S.D., Vota, D.M., Vittori, D.C. and Nesse AB. (2013) *Biochim Biophys*  
442 *Acta*, **1833**, 1960–1968.
- 443 10. Drüeke, T.B., Locatelli, F., Clyne, N., Eckardt, K.U., Macdougall, I.C., Tsakiris, D., Burger, H.U.,  
444 Scherhag, A. and CREATE Investigators. (2006) *N Engl J Med*, **355**, 2071–2084.
- 445 11. Egrie, J.C. and Browne, J.K. (2001) *Br J Cancer*, **84 Suppl 1**, 3–10.
- 446 12. Egrie, J.C., Dwyer, E., Browne, J.K., Hitz, A. and Lykos, M.A. (2003) *Exp Hematol*, **31**, 290–299.
- 447 13. Ehrenreich, H., Fischer, B., Norra, C., Schellenberger, F., Stender, N., Stiefel, M., Sirén, A.L.,  
448 Paulus, W., Nave, K.A., Gold, R. and Bartels, C. (2007) *Brain*, **130**, 2577–2588.
- 449 14. Ehrenreich, H., Hasselblatt, M., Dembowski, C., Cepek, L., Lewczuk, P., Stiefel, M., Rustenbeck,  
450 H.H., Breiter, N., Jacob, S., Knerlich, F., Bohn, M., Poser, W., Rütther, E., Kochen, M., Gefeller,  
451 O., Gleiter, C., Wessel, T.C., De Ryck, M., Itri, L., Prange, H., Cerami, A., Brines, M. and Sirén,  
452 A.L. (2002) *Mol Med*, **8**, 495–505.
- 453 15. Elliott, S., Lorenzini, T., Chang, D., Barzilay, J. and Delorme, E. (1997) *Blood*, **89**, 493–502.
- 454 16. Elliott, S., Sinclair, A., Collins, H., Rice, L. and Jelkmann, W. (2014) *Ann Hematol*, **93**, 181–192.
- 455 17. Epstein, A.C., Gleadle, J.M., McNeill, L.A., Hewitson, K.S., O'Rourke, J., Mole, D.R., Mukherji,  
456 M., Metzen, E., Wilson, M.I., Dhanda, A., Tian, Y.M., Masson, N., Hamilton, D.L., Jaakkola, P.,  
457 Barstead, R., Hodgkin, J., Maxwell, P.H., Pugh, C.W., Schofield, C.J. and Ratcliffe, P.J. (2001)  
458 *Cell*, **107**, 43–54.
- 459 18. Fantacci, M., Bianciardi, P., Caretti, A., Coleman, T.R., Cerami, A., Brines, M. and Samaja, M.  
460 (2006) *Proc Natl Acad Sci U S A*, **103**, 17531–17536.
- 461 19. Fuh, G., Cunningham, B.C., Fukunaga, R., Nagata, S., Goeddel, D.V. and Wells, J.A. (1992)  
462 *Science*, **256**, 1677–1680.

- 463 20. Gan, Y., Xing, J., Jing, Z., Stetler, R.A., Zhang, F., Luo, Y., Ji, X., Gao, Y. and Cao, G. (2012)  
464 *Stroke*, **43**, 3071–3077.
- 465 21. Ghezzi, P. and Brines, M. (2004) *Cell Death Differ*, **11**, S37–S44.
- 466 22. Hanazono, Y., Sasaki, K., Nitta, H., Yazaki, Y. and Hirai, H. (1995) *Biochem Biophys Res*  
467 *Commun*, **208**, 1060–1066.
- 468 23. Henke, M., Laszig, R., Rube, C., Schäfer, U., Haase, K.D., Schilcher, B., Mose, S., Beer, K.T.,  
469 Burger, U., Dougherty, C. and Frommhold, H. (2003) *Lancet*, **362**, 1255–1260.
- 470 24. Hernández, C.C., Burgos, C.F., Gajardo, A.H., Silva-Grecchi, T., Gavilan, J., Toledo, J.R.,  
471 Fuentealba, J. (2017) *Neural Regen Res*, **12**, 1381–1389.
- 472 25. Kallenberger, S.M., Beaudouin, J., Claus, J., Fischer, C., Sorger, P.K., Legewie, S. and Eils,  
473 R. (2014) *Sci Signal*, **7**, ra23.
- 474 26. Kitamura, T., Tange, T., Terasawa, T., Chiba, S., Kuwaki, T., Miyagawa, K., Piao, Y.F., Miyazono,  
475 K., Urabe, A. and Takaku, F. (1989) *J Cell Physiol*, **140**, 323–334.
- 476 27. Kontos, S. and Hubbell, J.A. (2010) *Mol Pharm*, **7**, 2141–2147.
- 477 28. Kontos, S., Kourtis, I.C., Dane, K.Y. and Hubbell, J.A. (2013) *Proc Natl Acad Sci U S A*, **110**,  
478 E60–E68.
- 479 29. Ktistakis, N.T., Thomas, D. and Roth, M.G. (1990) *J Cell Biol*, **111**, 1393–1407.
- 480 30. Lee, J., Vernet, A., Redfield, K., Lu, S., Ghiran, I.C., Way, J.C. and Silver, P.A. (2020) *ACS Synth*  
481 *Biol*, **9**, 191–197.
- 482 31. Leist, M., Ghezzi, P., Grasso, G., Bianchi, R., Villa, P., Fratelli, M., Savino, C., Bianchi, M.,  
483 Nielsen, J., Gerwien, J., Kallunki, P., Larsen, A.K., Helboe, L., Christensen, S., Pedersen, L.O.,  
484 Nielsen, M., Torup, L., Sager, T., Sfacteria, A., Erbayraktar, S., Erbayraktar, Z., Gokmen, N.,  
485 Yilmaz, O., Cerami-Hand, C., Xie, Q.W., Coleman, T., Cerami, A. and Brines, M. (2004) *Science*,  
486 **305**, 239–242.
- 487 32. Marshall, L.M., Thureson-Klein, A. and Hunt, R.C. (1984) *J Cell Biol*, **98**, 2055–2063.
- 488 33. Masuda, S., Okano, M., Yamagishi, K., Nagao, M., Ueda, M. and Sasaki, R. (1994) *J Biol Chem*,  
489 **269**, 19488–19493.
- 490 34. Nichol, A., French, C., Little, L., Presneill, J., Cooper, D.J., Haddad, S., Duranteau, J., Huet, O.,  
491 Skrifvars, M., Arabi, Y., Bellomo, R. and EPO-TBI Investigators and the Australian and New  
492 Zealand Intensive Care Society Clinical Trials Group. (2015) *Trials*. doi: 10.1186/s13063-014-  
493 0528-6.
- 494 35. Ogunshola, O.O. and Bogdanova, A.Y. (2013) *Methods Mol Biol*, **982**, 13–41.
- 495 36. Okazaki, T., Ebihara, S., Asada, M., Yamanda, S., Niu, K. and Arai, H. (2008) *Neoplasia*, **10**,  
496 932–939.
- 497 37. Park, K.H., Choi, N.Y., Koh, S.H., Park, H.H., Kim, Y.S., Kim, M.J., Lee, S.J., Yu, H.J., Lee, K.Y.,  
498 Lee, Y.J. and Kim, H.T. (2011) *Neurotoxicology*, **32**, 879–887.

- 499 38. Pfeffer, M.A., Burdmann, E.A., Chen, C.Y., Cooper, M.E., de Zeeuw, D., Eckardt, K.U., Feyzi,  
500 J.M., Ivanovich, P., Kewalramani, R., Levey, A.S., Lewis, E.F., McGill, J.B., McMurray, J.J.,  
501 Parfrey, P., Parving, H.H., Remuzzi, G., Singh, A.K., Solomon, S.D., Toto, R. and TREAT  
502 Investigators. (2009) *N Engl J Med*, **361**, 2019–2032.
- 503 39. Robinson, S., Winer, J.L., Chan, L.A.S., Oppong, A.Y., Yellowhair, T.R., Maxwell, J.R., Andrews,  
504 N., Yang, Y., Sillerud, L.O., Meehan, W.P. III, Mannix, R., Brigman, J.L. and Jantzie, L.L. (2018)  
505 *Front Neurol*. doi: 10.3389/fneur.2018.00451.
- 506 40. Singh, A.K., Szczech, L., Tang, K.L., Barnhart, H., Sapp, S., Wolfson, M., Reddan, D. and CHOIR  
507 Investigators. (2006) *N Engl J Med*, **355**, 2085–2098.
- 508 41. Syed, R.S., Reid, S.W., Li, C., Cheetham, J.C., Aoki, K.H., Liu, B., Zhan, H., Osslund, T.D.,  
509 Chirino, A.J., Zhang, J., Finer-Moore, J., Elliott, S., Sitney, K., Katz, B.A., Matthews, D.J.,  
510 Wendoloski, J.J., Egrie, J. and Stroud, R.M. (1998) *Nature*, **395**, 511–516.
- 511 42. Taylor, N.D., Way, J.C., Silver, P.A. and Cironi, P. (2010) *Protein Eng Des Sel*, **23**, 251–260.
- 512 43. Vengellur, A. and LaPres, J.J. (2004) *Toxicol Sci*, **82**, 638–646.
- 513 44. Wiley, H.S. (2003) *Exp Cell Res*, **284**, 78–88.
- 514 45. Yasuda, Y., Fujita, Y., Matsuo, T., Koinuma, S., Hara, S., Tazaki, A., Onozaki, M., Hashimoto, M.,  
515 Musha, T., Ogawa, K., Fujita, H., Nakamura, Y., Shiozaki, H. and Utsumi, H. (2003)  
516 *Carcinogenesis*, **24**, 1021–1029.
- 517 46. Yuan, Y., Hilliard, G., Ferguson, T. and Millhorn, D.E. (2003) *J Biol Chem*, **278**, 15911–15916.
- 518
