# Supplementary material for: Rational engineering of an erythropoietin fusion protein to treat hypoxia
Source: bioRxiv or medRxiv preprint supplement (doi:10.1101/2021.06.24.449789), 2021-06-24
Supplement: Supplementary file [file media-1.pdf]

1 **Supplementary Information**

2

3 **Rational engineering of an erythropoietin fusion protein to treat hypoxia**

4

5 Jungmin Lee<sup>1,2,5</sup>, Andyna Vernet<sup>2</sup>, Nathalie G. Gruber<sup>1,2,4</sup>, Kasia M. Kready<sup>1</sup>, Devin R. Burrill<sup>1,2</sup>, Jeffrey C.  
6 Way<sup>1,2,3,5,\*</sup> and Pamela A. Silver<sup>1,2</sup>

7

8 <sup>1</sup>Department of Systems Biology, Harvard Medical School, Boston, MA 02115, USA.

9 <sup>2</sup>Wyss Institute for Biologically Inspired Engineering, Harvard University, Boston, MA 02115, USA.

10 <sup>3</sup>Laboratory of Systems Pharmacology, Harvard Medical School, Boston, MA 02115, USA.

11 <sup>4</sup>Current address: Institute of Science and Technology Austria, 3400 Klosterneuburg, Austria.

12 <sup>5</sup>These authors contributed equally to this work.

13

14 \*To whom correspondence should be addressed.

15 Email: Jeffrey\_Way@hms.harvard.edu

16

17

18 **Table of Contents**

19 Supplementary Figures (Fig. S1–5)

20 Quantitative explanation of extreme potency of IH4-EPO(L108A or R103K)

21 Table of Relevant Binding Parameters

22 DNA and Protein Sequences

23 EPO Mutations

24

25 **Supplementary Figures**

26 Supplementary Figure 1

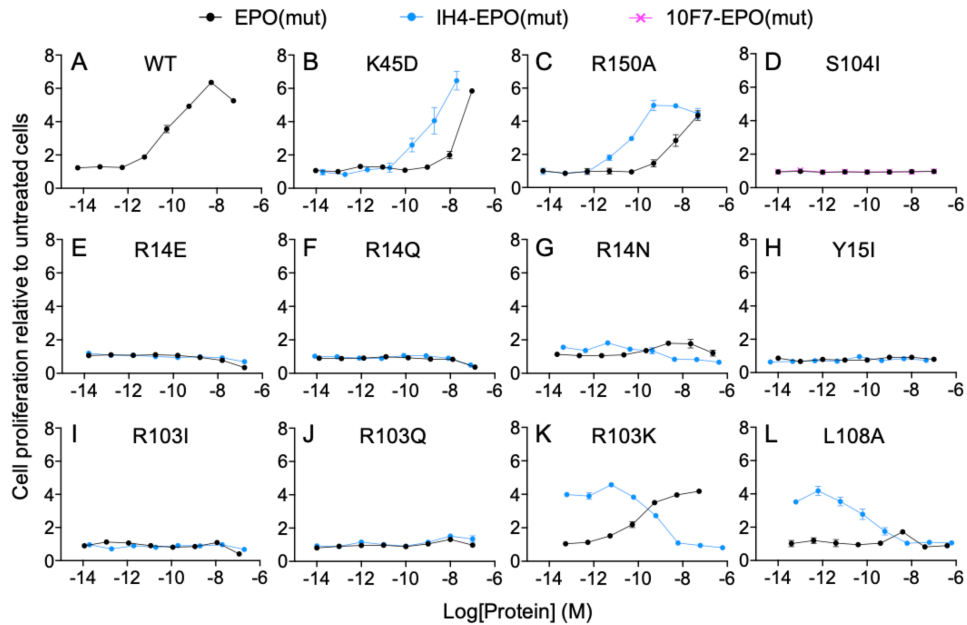

27 **Fig. S1.** *In vitro* erythropoietic activities of EPO mutants in unfused and antibody-fused forms. Standard  
 28 TF-1 cell proliferation assays were performed to measure the ability of EPO mutants to stimulate cell  
 29 proliferation. The same mutants fused to an anti-GPA antibody fragment (IH4 nanobody or 10F7 scFv) via  
 30 a five-amino acid linker were tested for GPA-dependent activation of EPOR. **(A)** Wildtype EPO activity as  
 31 a positive control. **(B,C)** Strong-face mutants, K45D and R150A, reduce the EPO activity but show  
 32 enhanced activity upon fusion to IH4. **(D–J)** Most weak-face mutations at R14, Y15, S104, and R103 of  
 33 EPO do not show any activity even when they are fused to an antibody element. **(K,L)** Weak-face  
 34 mutants, R103K and L108A, show slightly reduced and almost no activity by itself, respectively. Their  
 35 fusion to IH4 exhibits inverted dose response curves, in which their activity is greatly enhanced at low  
 36 concentrations but drops back to the baseline at high concentrations. Data represent mean  $\pm$  S.E.M. of  
 37 three replicates.  
 38

39 Supplementary Figure 2

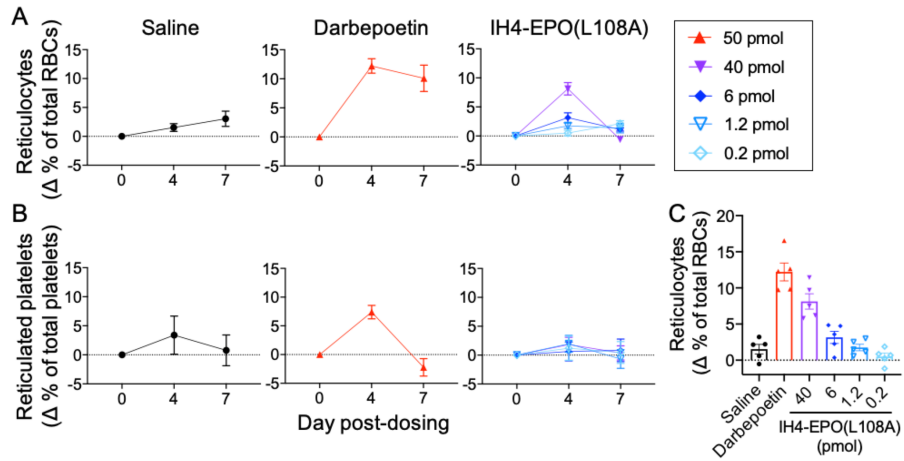

40 **Fig. S2.** *In vivo* erythropoietic activity of IH4-EPO(L108A). Transgenic mice that express human GPA on  
 41 RBCs received a single i.p. injection of saline, darbepoetin, or IH4-EPO(L108A). Reticulocyte and  
 42 reticulated platelet levels were measured by flow cytometry on Days 0, 4, and 7 post-injection. **(A,B)** IH4-  
 43 EPO(L108A) specifically stimulates RBC production and not platelet production. **(C)** IH4-EPO(L108A)  
 44 induces erythropoiesis in a dose-dependent manner as shown on Day 4 post-injection. Data represent  
 45 mean  $\pm$  S.E.M of five mice per dose group.  
 46

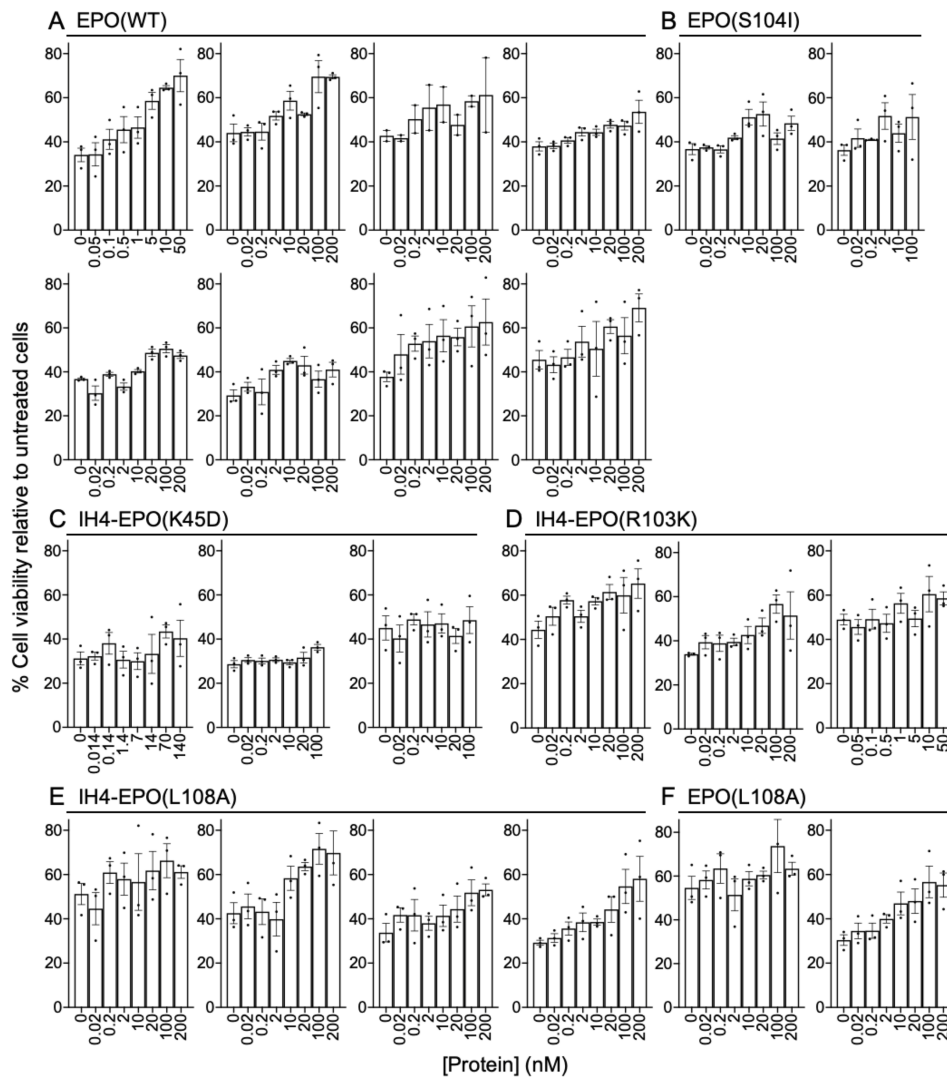

48  
 49 **Fig. S3.** Ability of EPO variants to protect neuronal cells from  $\text{CoCl}_2$ -induced hypoxic damage *in vitro*. SH-  
 50 SY5Y cells were co-treated with EPO and 100  $\mu\text{M}$   $\text{CoCl}_2$  for 24 hr and cell viability was measured. For  
 51 each protein, at least two repeat experiments were performed. **(A,B)** Two positive controls, EPO(WT) and  
 52 EPO(S104I), show tissue-protective effect in a dose-dependent manner, although EPO(S104I) shows  
 53 much weaker effect. **(C)** Fusion protein containing a strong-face mutation, K45D, does not have tissue-  
 54 protective activity. **(D,E)** Fusion protein containing a weak-face mutation, R103K or L108A, protects  
 55 neuronal cells from  $\text{CoCl}_2$ -induced cell death. Note that the dynamic range can vary between experiments  
 56 but the tissue-protective effects are reproducible. Data represent mean  $\pm$  S.E.M. of two to three  
 57 replicates.

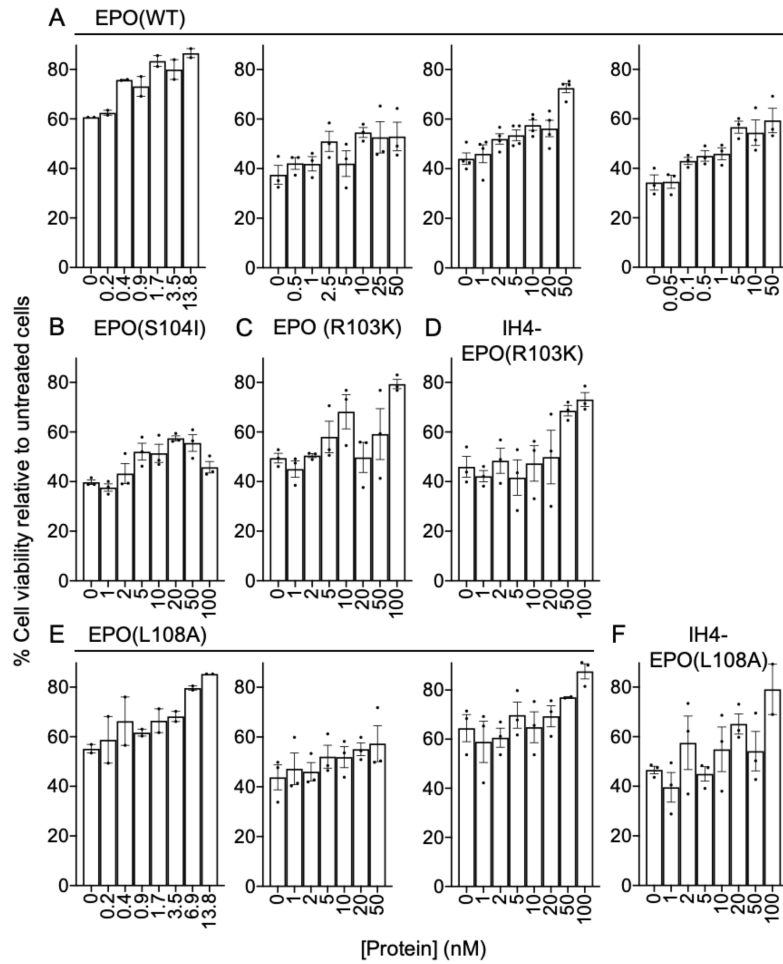

59  
 60 **Fig. S4.** Pre-exposure to EPO variants also protects neuronal cells from  $\text{CoCl}_2$ -induced hypoxic damage  
 61 *in vitro*. SH-SY5Y cells were pre-treated with EPO 24 hr prior to adding  $\text{CoCl}_2$ . Cells were incubated for  
 62 additional 24 hr after receiving  $100 \mu\text{M}$   $\text{CoCl}_2$  and cell viability was measured. **(A,B)** Two positive controls,  
 63 EPO(WT) and EPO(S104I), show tissue-protective effect in a dose-dependent manner, although  
 64 EPO(S104I) shows much weaker effect. **(C-F)** EPO(R103K or L108A) in an unfused or antibody-fused  
 65 form protects neuronal cells from  $\text{CoCl}_2$ -induced cell death. Note that the dynamic range can vary  
 66 between experiments but the tissue-protective effects are reproducible. Data represent mean  $\pm$  S.E.M. of  
 67 two to four replicates.  
 68

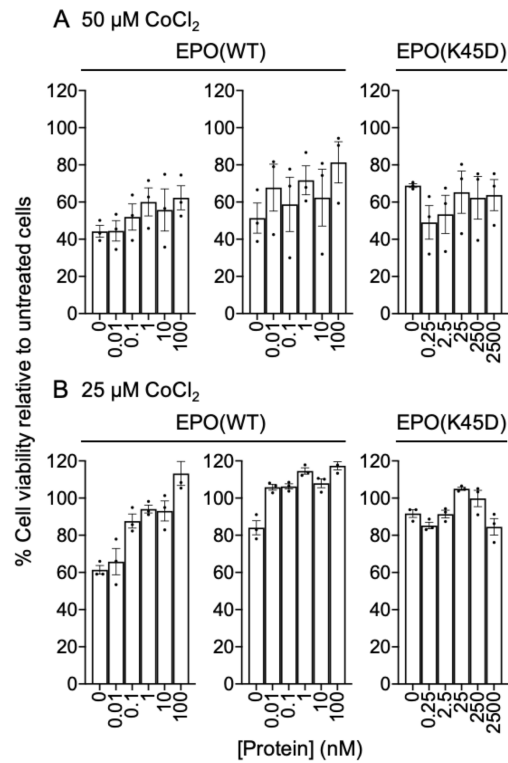

70

71 **Fig. S5.** Ability of EPO variants to protect SH-SY5Y cells from  $\text{CoCl}_2$ -induced hypoxic damage *in vitro*.  
 72 SH-SY5Y cells were co-treated with EPO and  $\text{CoCl}_2$  for 72 hr and cell viability was measured. Hypoxic  
 73 damage was induced using (A) 50  $\mu\text{M}$  and (B) 25  $\mu\text{M}$   $\text{CoCl}_2$ . Positive control, EPO(WT), but not a strong-  
 74 side mutant, EPO(K45D), shows tissue-protective activity. Note that the dynamic range can vary between  
 75 experiments but the tissue-protective effects are reproducible. Data represent mean  $\pm$  S.E.M. of three  
 76 replicates.

77

78 **Quantitative explanation of extreme potency of IH4-EPO(L108A or R103K)**

79 We hypothesize that the extremely potent signaling of IH4-EPO(L108A or R103K) (Table II and  
80 Fig. 2A) can be explained by a lack of receptor-mediated endocytosis, such that signaling is not  
81 terminated after receptor activation (Fig. 2B). Some receptor tyrosine kinase systems involve a rapid  
82 phosphorylation event(s) that initiates signaling that results in transcriptional modulation, followed by  
83 slower phosphorylation events that lead to receptor-mediated endocytosis and degradation of the  
84 receptor and/or ligand (Wiley, 2003). According to our hypothesis, mutation of the weak face of EPO  
85 could further reduce the stability of the EPO-(EPOR)<sub>2</sub> complex, such that this complex is rapidly forming  
86 but also dissociates so rapidly that endocytosis-stimulating phosphorylation does not occur.

87 Despite the extreme potency of IH4-EPO(L108A) *in vitro*, this fusion protein does not have  
88 enhanced potency *in vivo*, and behaves similarly to our previous Targeted EPO (Burrill *et al.*, 2016; Lee *et al.*,  
89 2020) with respect to RBC production and lack of platelet production (Fig. 3). In a culture dish,  
90 receptor-mediated endocytosis by a single cell type is the only mechanism to terminate signaling, but *in*  
91 *vivo* the fusion protein may disappear through renal clearance, bulk fluid pinocytosis, and by binding to  
92 EPOR on non-hematopoietic cells, followed by non-signaling endocytosis and protein degradation that is  
93 part of normal membrane turnover. Thus, IH4-EPO(L108A) should have a clearance rate and potency  
94 that would be compatible with its use as a treatment for hypoxia and related disorders.

95 The following calculations provide quantitative explanations for our hypothesis. Kinetics  
96 parameters relevant to these calculations can be found in the “Table of Relevant Binding Parameters”  
97 below.

98 **1. Minimum number of fusion protein molecules needed for signaling**

99 The extreme potency of IH4-EPO(L108A or R103K) allows an estimate of about 6 to 60 fusion  
100 protein molecules per cell are required for EPO-induced signaling in TF-1 cells. At the EC<sub>50</sub> of ~1–10 fM  
101 for stimulation of TF-1 cell proliferation, there are about 6 to 60 molecules of the fusion protein per cell at  
102 the start of the assay. Specifically, there are about 9,000 cells and 600,000 fusion protein molecules per  
103 100 μL in a well at the start of the proliferation assay. This provides an estimate for the minimum number  
104 of receptor–ligand complexes required to trigger EPO-induced signaling in TF-1 cells.

105 **2. Slow dissociation of a fusion protein from GPA and EPOR**

106 When IH4-EPO(L108A or R103K) binds to the surface of a TF-1 cell, binding is stabilized through  
107 simultaneous interaction with GPA (K<sub>D</sub> = 33 nM) and EPOR via the strong-binding face of EPO (K<sub>D</sub> = 0.1–  
108 1 nM). In this state, the local concentration of the bound fusion protein can be estimated by the number of  
109 receptor-bound fusion protein molecules and effective volume occupied by these molecules around the  
110 cell surface. The effective volume is approximated as 1 μm<sup>3</sup> by multiplying the cell surface area (1000  
111 μm<sup>2</sup>) by the distance from the cell surface in which the fusion protein is trapped (about 1 nm), so one  
112 molecule has a concentration of about 1.66 x 10<sup>-9</sup> M. This means that the local concentration of GPA on  
113 the surface of a TF-1 cell is about (1.6 x 10<sup>-9</sup> M) x (3860 GPA molecules) = 6.2 x 10<sup>-6</sup> M. Given the K<sub>D</sub>  
114 value of IH4 to GPA is 33 nM, about 99.5% of GPA molecules will be also bound by fusion proteins via

115 IH4, when they are bound to EPOR via the strong face of the EPO element. Due to this avidity effect, the  
116 effective dissociation half-time may be increased by ~200-fold. Based on these calculations, we estimate  
117 that the effective dissociation half-time of the fusion protein from both EPOR and GPA would be ~100 hr,  
118 which is longer than the length of the experiment (72 hr). Non-signaling membrane proteins are normally  
119 endocytosed more slowly and recycling more efficiently, such that they have a metabolic turnover in the  
120 range of 12 hours or more (Wiley, 2003). Moreover, it is possible that GPA is anchored to the  
121 cytoskeleton in a way that slows or prevents this process even further (Marshall *et al.*, 1984; Ktistakis *et*  
122 *al.*, 1990). Thus, in proliferation assay wells with EPO in concentrations 1 to 100 fM, EPO will be in molar  
123 excess relative to EPO receptors, essentially all of the EPO will be bound to at least one receptor, and  
124 turnover of EPO is likely to be slow enough that much of it survives the 72-hour incubation of the assay.

### 125 **3. Rapid association and dissociation between a second EPOR and the GPA–EPOR–** 126 **fusion protein complex**

127 In the configuration where the fusion protein is bound to GPA and an EPOR, binding to a second  
128 EPOR would occur rapidly because the EPO element is positioned at the correct height from the  
129 membrane and in the correct orientation for such binding, and the binding would rely predominantly on  
130 the two-dimensional diffusion within the membrane. The on-rate of a fusion protein already bound to GPA  
131 and an EPOR for a second EPOR is assumed to be high because the effective molarity of the cell-bound  
132 fusion protein is high, and because the EPO element is rotationally constrained to place its weak EPOR-  
133 binding face in the correct orientation relative to the second EPOR.

134 However, the mutation (e.g. L108A) on the weak face of EPO likely allows for rapid dissociation  
135 of this second EPOR. The interaction with EPOR of wild-type EPO through its weak face is estimated to  
136 have a  $K_D$  of about 2  $\mu\text{M}$  (for the soluble interaction; Philo *et al.*, 1996). Assuming that the diffusion-limited  
137  $k_{\text{on}}$  of EPO to EPOR via the weak face is the same as for the strong-face interaction ( $k_{\text{on}} = 8.3 \times 10^6 \text{ M}^{-1} \text{ s}^{-1}$ )  
138 (Gross and Lodish, 2006), the dissociation rate constant ( $k_{\text{off}}$ ) would be about  $18 \text{ s}^{-1}$ , such that the  
139 complex dissociates in  $<0.1$  second in the absence of other interactions, such as the EPOR Box1-  
140 Box2/JAK2 FERM dimerization (Ferrao *et al.*, 2018).

141



142 **Table of Relevant Binding Parameters**

| Receptor             | Ligand               | $K_D$ (M)                              | $k_{on}$ ( $M^{-1}s^{-1}$ ) | $k_{off}$ ( $s^{-1}$ )    | $T_{1/2}^*$ | References                                  |
|----------------------|----------------------|----------------------------------------|-----------------------------|---------------------------|-------------|---------------------------------------------|
| GPA                  | IH4                  | $3.37 \times 10^{-8}$                  | $5.73 \times 10^5$          | $1.9 \times 10^{-2}$      | 0.6 min     | Habib <i>et al.</i> , 2013                  |
| Soluble EPOR         | EPO(WT)              | $2.0 \times 10^{-10}$<br>(Strong face) | –                           | –                         | –           | Philo <i>et al.</i> , 1996                  |
|                      |                      | $2.1 \times 10^{-6}$<br>(Weak face)    | –                           | –                         | –           | Philo <i>et al.</i> , 1996                  |
| EPOR on cells        | EPO(WT)              | $6.0 \times 10^{-11}$                  | $8.33 \times 10^6$          | $5.0 \times 10^{-4}$      | 23 min      | Gross & Lodish, 2006                        |
| EPOR-Fc              | EPO(WT)              | $5.4 \times 10^{-9}$                   | $3.9 \times 10^4$           | $2.1 \times 10^{-4}$      | 55 min      | Burrill <i>et al.</i> , 2016                |
| Soluble EPOR         | EPO(WT)              | $2.1 \times 10^{-6}$<br>(Weak face)    | $\sim 10^6$                 | $\sim 2.1 \times 10^{-0}$ | 0.5 sec     | Inferred from Philo <i>et al.</i> , 1996    |
| EPOR on cells        | EPO(WT)              | $6.0 \times 10^{-7}$<br>(Weak face)    | $\sim 8.33 \times 10^6$     | $\sim 5 \times 10^0$      | 0.2 sec     | Inferred from Gross & Lodish, 2006          |
| EPOR-Fc              | EPO(WT)              | $5.4 \times 10^{-5}$                   | $\sim 3.9 \times 10^4$      | $\sim 2.1 \times 10^0$    | 0.5 sec     | Inferred from Burrill <i>et al.</i> , 2016  |
| EPOR (via weak face) | Weak-face EPO mutant | ** $6.0 \times 10^{-6}$<br>(Weak face) | # $8.33 \times 10^6$        | $\sim 5 \times 10^1$      | 0.02 s      | Estimated from Gross & Lodish, 2006         |
| EPOR (via weak face) | Weak-face EPO mutant | ** $5.4 \times 10^{-4}$<br>(Weak face) | ## $3.9 \times 10^4$        | $\sim 2.1 \times 10^1$    | 0.05 s      | Estimated from Burrill <i>et al.</i> , 2016 |

143 \*For comparison, we note that the internalization rate constant ( $k_{int}$ ) of EPO(WT) is  $\sim 1.0 \times 10^{-3} s^{-1}$ , giving an  
 144 internalization half-time of  $\sim 11.5$  min (Gross & Lodish, 2006) for receptor-mediated endocytosis.

145 \*\* $K_D$  of the weak-face EPO L108A mutant protein to EPOR via the weak side interaction is estimated to  
 146 be about 10-fold weaker than for a wild-type weak-face interaction. This is based on cell-based assay  
 147 results of Elliott *et al.* (1997) and typical effects of a leucine-to-alanine mutation that removes a protein-  
 148 protein interaction contact without otherwise affecting protein structure (Piehler *et al.*, 2000).

149 #Diffusion-limited  $k_{on}$  of a weak-face EPO mutant to EPOR is assumed to stay the same as the strong-  
 150 side interaction, and is estimated based on Gross & Lodish (2006).

151 ##Diffusion-limited  $k_{on}$  of a weak-face EPO mutant to EPOR is assumed to stay the same as the strong-  
 152 side interaction, and is estimated based on Burrill *et al.* (2016).

153 **DNA and Protein Sequences**

|             | Protein sequence                                                                                                                                                                                        | DNA sequence                                                                                                                                                                                                                                                                                                                                                                                                                                                                                                                                                 |
|-------------|---------------------------------------------------------------------------------------------------------------------------------------------------------------------------------------------------------|--------------------------------------------------------------------------------------------------------------------------------------------------------------------------------------------------------------------------------------------------------------------------------------------------------------------------------------------------------------------------------------------------------------------------------------------------------------------------------------------------------------------------------------------------------------|
| IH4         | QVQLQESGGGSVQAGGSLRL<br>SCVASGYTDSTYCVGWFRQA<br>PGKEREGVARINTISGRPWY<br>ADSVKGRFTISQDNSKNTVY<br>LQMNSLKPEDTAIYYCTLTT<br>ANSRGFCSGGYNYKGQGTQV<br>TVS                                                     | CAGGTCCAACCTGCAAGAGAGCGGCGGGGGGTCAGTTCAGGCGGGG<br>GGGAGTCTGCGGTTGAGCTGCGTAGCTTCAGGCTACACTGACAGC<br>ACCTACTGCGTGGGATGGTTTCGGCAGGCACCCGGCAAGGAACGA<br>GAGGGCGTTGCACGGATCAACACTATCTCCGGTCGGCCTTGGTAC<br>GCAGATAGTGTAAAGGGACGGTTTACTATTAGTCAGGATAACTCT<br>AAGAATACCGTCTACCTTCAGATGAATAGCCTGAAACCGGAAGAC<br>ACGGCTATTTACTATTGCACCCTTACAACGCCAACAGCAGAGGG<br>TTTTGTCTGGGGGATATAACTACAAAGGACAGGGGACCCAAGTC<br>ACTGTCAGC                                                                                                                                             |
| 5 AA linker | SGGGS                                                                                                                                                                                                   | TCTGGTGGTGGTTC                                                                                                                                                                                                                                                                                                                                                                                                                                                                                                                                               |
| EPO (WT)    | APPRLICDSRVLERYLLEAK<br>EAENITTGCAEHCSLNENIT<br>VPDTKVNIFYAWKRMEVGQQA<br>VEVWQGLALLSEAVLRGQAL<br>LVNSSQPWEPLQLHVDKAVS<br>GLRSLTLLRALGAQKEAIS<br>PPDAASAAPLRTITADTFRK<br>LFRVYSNFLRGKCLKLYTGEA<br>CRTGDR | GCCCCACCTAGATTGATTTGTGATTCCAGAGTTTTGGAAAGATAC<br>TTGTTGGAAGCTAAGGAGGCTGAAAATATTACTACTGGTTGTGCT<br>GAACATTGTTCTTTGAACGAGAATATTACTGTTCCAGATACTAAG<br>GTTAACTTTTACGCTTGGAAGAGAATGGAAGTTGGTCAGCAAGCT<br>GTTGAAGTTTGGCAAGTTTGGCTTTGTTGTCTGAAGCTGTTTTG<br>AGAGGTCAAGCTTTGTTGGTTAATTCTTCTCAACCATGGGAACCA<br>TTGCAATTGCATGTTGATAAGGCTGTTTCTGGTTTGAGATCTTTG<br>ACTACCTTGTGAGAGCTTTGGGTGCTCAAAAGGAAGCTATTTCT<br>CCTCCAGATGCTGCTTCTGCCGCTCCATTGAGAACTATTACTGCT<br>GATACTTTTAGAAAGTTGTTTAGAGTTTACTCTAACTTCTTGAGA<br>GGTAAGTTGAAGTTGTACACTGGTGAAGCTTGTAGAACTGGTGAT<br>CGG |

154

155 **EPO Mutations**

|       | Amino acid change | Codon change |
|-------|-------------------|--------------|
| K45D  | Lys → Asp         | AAG → GAT    |
| R150A | Arg → Ala         | AGA → GCC    |
| R14E  | Arg → Glu         | AGA → GAA    |
| R14Q  | Arg → Gln         | AGA → CAA    |
| R14N  | Arg → Asn         | AGA → AAC    |
| Y15I  | Tyr → Ile         | TAC → ATC    |
| R103I | Arg → Ile         | AGA → ATC    |
| R103Q | Arg → Gln         | AGA → CAG    |
| R103K | Arg → Lys         | AGA → AAA    |
| S104I | Ser → Ile         | TCT → ATC    |
| L108A | Leu → Ala         | TTG → GCG    |

156

157 **References**

- 158 1. Burrill, D.R., Vernet, A., Collins, J.J., Silver, P.A. and Way J.C. (2016) *Proc Natl Acad Sci U S A*,  
159 **113**, 5245–5250.
- 160 2. Elliott, S., Lorenzini, T., Chang, D., Barzilay, J. and Delorme, E. (1997) *Blood*, **89**, 493–502.
- 161 3. Ferrao, R.D., Wallweber, H.J. and Lupardus, P.J. (2018) *Elife*, **7**:e38089. doi: 10.7554/eLife.
- 162 4. Gross, A.W. and Lodish, H.F. (2006) *J Biol Chem*, **281**, 2024–2032.
- 163 5. Habib, I., Smolarek, D., Hattab, C., Grodecka, M., Hassanzadeh-Ghassabeh, G., Muyltermans,  
164 S., Sagan, S., Gutiérrez, C., Laperche, S., Le-Van-Kim, C., Aronovicz, Y.C., Wasniowska, K.,  
165 Gangnard, S. and Bertrand, O. (2013) *Anal Biochem*, **438**, 82–89.
- 166 6. Ktistakis, N.T., Thomas, D. and Roth, M.G. (1990) *J Cell Biol*, **111**, 1393–1407.
- 167 7. Lee, J., Vernet, A., Redfield, K., Lu, S., Ghiran, I.C., Way, J.C. and Silver, P.A. (2020) *ACS Synth*  
168 *Biol*, **9**, 191–197.
- 169 8. Marshall, L.M., Thureson-Klein, A. and Hunt, R.C. (1984) *J Cell Biol*, **98**, 2055–2063.
- 170 9. Philo, J.S., Aoki, K.H., Arakawa, T., Narhi, L.O. and Wen, J. (1996) *Biochemistry*, **35**, 1681–1691.
- 171 10. Piehler, J., Roisman, L.C. and Schreiber, G. (2000) *J Biol Chem*, **275**, 40425–40433.
- 172 11. Wiley, H.S. (2003) *Exp Cell Res*, **284**, 78–88.
- 173
